# Supplementary material
Source: PubMed Central journal article supplement (PMC3875151)
Supplement: Supp_Fig1.pdf [file Supp_Fig1.pdf]

## Supplementary Data

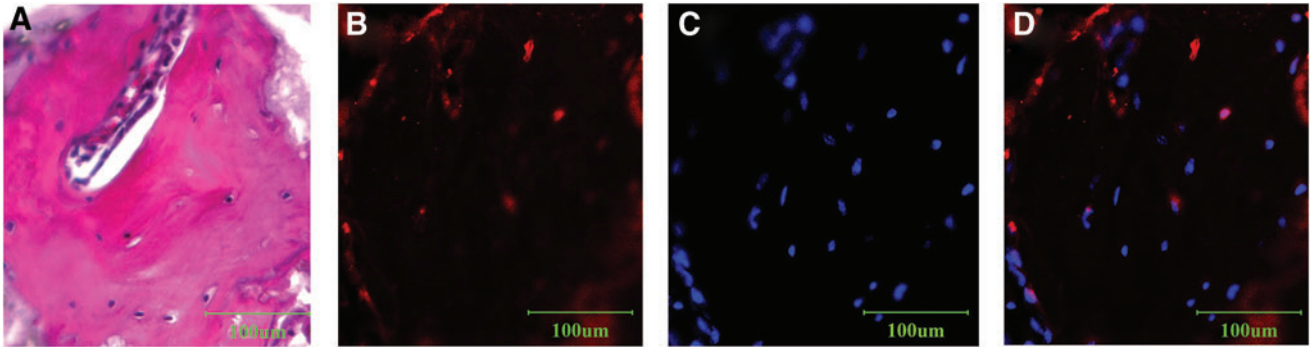

**SUPPLEMENTARY FIG. S1.** Immunofluorescence staining for human Lamin A/C in the implant seeded with bursa-derived mesenchymal stem cells (MSCs). **(A)** Haematoxylin and eosin staining of a tissue section made from an implant seeded with bursa MSCs demonstrating presence of bone. **(B)** Immunofluorescence staining of human Lamin A/C demonstrating presence of bursa donor cells in the new made bone shown in **(A)**. **(C)** DAPI staining in the tissue section shown in **(B)**. **(D)** Overlay image of B and C demonstrating that bursa donor cells are present in the newly made bone. The data demonstrate that donor bursa cells are present in the newly made and therefore, were responsible for the new bone in the scaffolds. Magnification 200 $\times$ .
